# Supplementary material
Source: PubMed Central journal article supplement (PMC4117385)
Supplement: bj4590275add.pdf [file bj4590275add.pdf]

## SUPPLEMENTARY ONLINE DATA

# Phosphorylation by Akt within the ST loop of AMPK- $\alpha$ 1 down-regulates its activation in tumour cells

Simon A. HAWLEY\*, Fiona A. ROSS\*, Graeme J. GOWANS\*, Priyanka TIBAREWAL\*<sup>1</sup>, Nicholas R. LESLIE\*<sup>1</sup> and D. Grahame HARDIE\*<sup>2</sup>

\*Division of Cell Signalling & Immunology, College of Life Sciences, University of Dundee, Dundee DD1 5EH, Scotland, U.K.

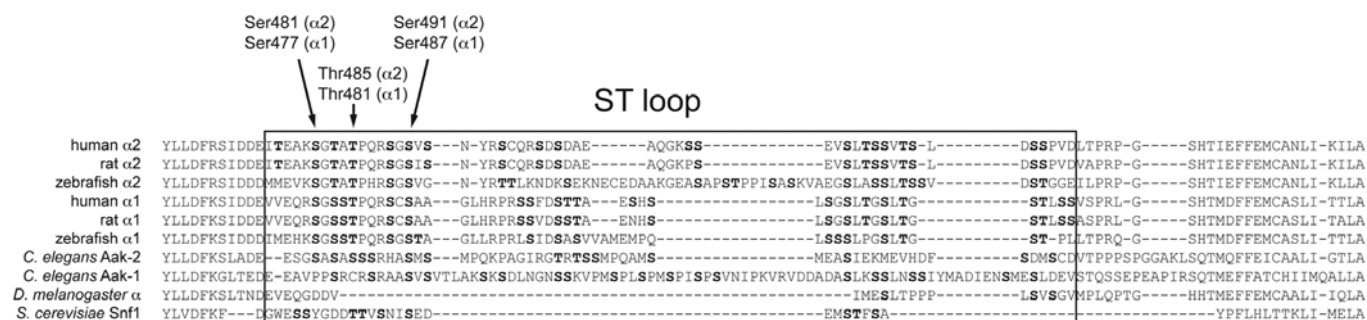

**Figure S1 C-terminal sequences of selected vertebrate and non-vertebrate AMPK- $\alpha$  subunits, showing the location of the ST loop (boxed)**

Sequences were aligned using CLC Main Workbench 6 using a 'gap open cost' of 10 and a 'gap extension cost' of 1. Note that the ST loop is well conserved between vertebrates and *C. elegans*, but poorly conserved and truncated in the sequences from insects (*D. melanogaster*) and fungi (*S. cerevisiae*). Serine and threonine residues within the ST loop are highlighted in bold font. The positions of Ser<sup>487</sup>/Ser<sup>491</sup>, Thr<sup>481</sup>/Thr<sup>485</sup> and Ser<sup>477</sup>/Ser<sup>481</sup> (AMPK- $\alpha$ 1/AMPK- $\alpha$ 2 respectively, human numbering; see the main text for details) are indicated.

<sup>1</sup> Present address: Institute of Biological Chemistry, Biophysics and Bioengineering, School of Engineering and Physical Sciences, Heriot Watt University, Edinburgh EH14 4AS, Scotland, U.K.

<sup>2</sup> To whom correspondence should be addressed (email d.g.hardie@dundee.ac.uk).

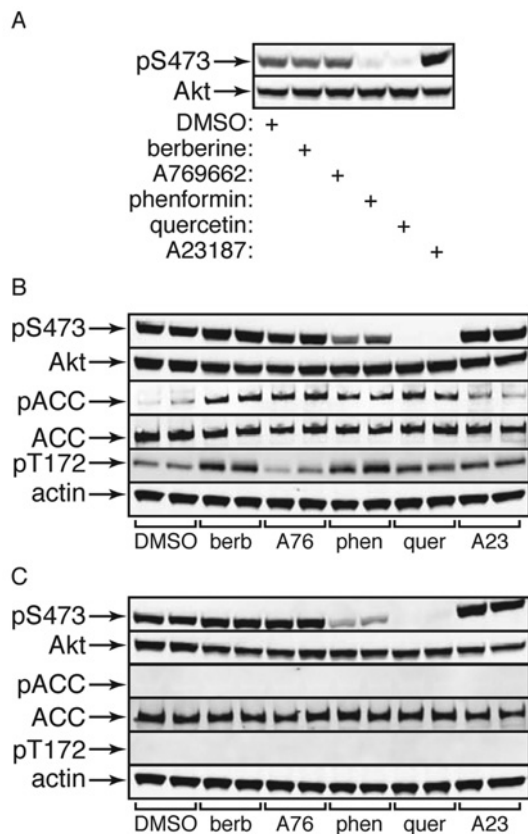

**Figure S2 Some AMPK activators inhibit Akt in an AMPK-independent manner**

(A) DBTRG-05MG cells were incubated for 60 min with vehicle (DMSO), berberine (300  $\mu$ M), A769662 (300  $\mu$ M), phenformin (10 mM), quercetin (300  $\mu$ M) or A23187 (10  $\mu$ M) and lysates were analysed by Western blotting using anti-pS473 and anti-Akt antibodies. (B) WT MEFs were incubated in duplicate dishes with DMSO, berberine, A769662, phenformin, quercetin or A23187 as in (A), and lysates analysed by Western blotting using the indicated antibodies. (C) As with (B), but using AMPK-knockout (KO) MEFs.

Received 9 October 2013/16 January 2014; accepted 27 January 2014  
 Published as BJ Immediate Publication 27 January 2014, doi:10.1042/BJ20131344
